# Supplementary material for: Supramolecular topology design of silver(i) and copper(ii) coordination polymers through a new semi-rigid sulfonyl ligand with different anion templates
Source: Royal Society of Chemistry journal article supplement (doi:10.1039/c9dt00257j), 2019-01-01
Supplement: c9dt00257j1.pdf [file c9dt00257j1.pdf]

# Supporting information

## Molecular and supramolecular architecture of silver (I) and copper (II) complexes with a new semi-rigid sulfonyl ligand

Zhaoxian Qin<sup>a,b,‡</sup>, Li Zhao<sup>a,‡</sup>, Qian Xiao<sup>a</sup>, Xinzhan Sun<sup>a</sup>, Aimin Li<sup>a</sup>, Zhiwen Li<sup>b,c</sup>, Shanli Tian<sup>b</sup>, Yuheng Deng<sup>a</sup>, Jiangwei Zhang<sup>b,\*</sup> and Chongqing Wan<sup>a,\*</sup>

<sup>a</sup>Beijing Key Laboratory for Optical Materials and Photonic Devices, Department of Chemistry, Capital Normal University, Beijing 100048, P.R. China. E-mail: wancq@cnu.edu.cn (C.W.)

<sup>b</sup>Gold Catalysis Research Center, State Key Laboratory of Catalysis, Dalian Institute of Chemical Physics, Chinese Academy of Sciences, Dalian 116023, P.R. China. E-mail: jwzhang@dicp.ac.cn (J.Z.)

<sup>c</sup>Department of Chemistry and Chemical Engineering, Liaoning Normal University, Dalian, 116029, P.R.China.

<sup>‡</sup>These authors contributed equally to this publication.

### I. Synthesis of 2-((pyridin-2-ylsulfide)methyl)pyridine (a)

To a round-bottom flask equipped with a magnetic stirrer, 2-(chloromethyl)pyridine hydrochloride (1.312 g, 8 mmol) and NH<sub>3</sub> (640 mg, 16 mmol) dissolved in ethanol were added, followed by the addition of 2-mercaptopyridine (890 mg, 8 mmol) with stir. The mixture was kept stirring and refluxing for 16 hours. Upon completion, the mixture was filtrated and the filtrate was concentrated by rotary evaporation. The yellow oil obtained was further purified by column chromatography on silica gel using CH<sub>2</sub>Cl<sub>2</sub> as the eluent. 2-((pyridin-2-ylsulfide)methyl)pyridine was obtained as a yellow oil (970 mg). Yield: 60%. <sup>1</sup>H NMR (600 MHz, CDCl<sub>3</sub>) δ: 8.54 (d, 1H), 8.43 (d, 1H), 7.59 (t, 1H), 7.46 (m, 2H), 7.21 (d, 1H), 7.14 (t, 1H), 6.98 (t, 1H), 4.59 (s, 2H).

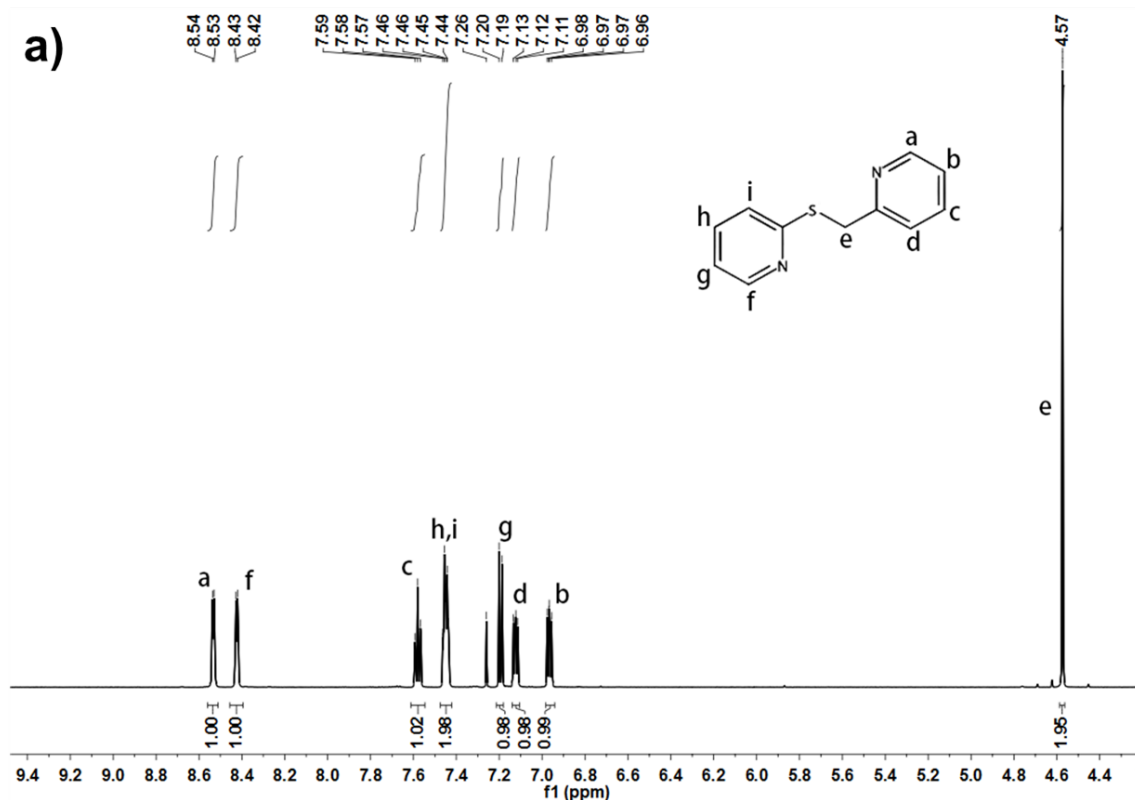

**Figure S1.**  $^1\text{H}$  NMR (600 MHz,  $\text{CDCl}_3$ ) of 2-((pyridin-2-ylsulfide)methyl)pyridine.

## II. Synthesis of 2-((pyridin-2-ylsulfone)methyl)pyridine (L)

To a solution of 2-((pyridin-2-ylsulfide)methyl)pyridine (970 mg, 4.8 mmol) in glacial acetic acid (30 ml),  $\text{H}_2\text{O}_2$  (30% w/w, 2.5 ml) was added with stirring at room temperature. Then, the mixture was stored at room temperature for a week, followed by concentrating in vacuo. Water (40 ml) was added into the residue to afford a white precipitate. The crude product was collected by filtration and purified by chromatography on silica gel. The 2-((pyridin-2-ylsulfone)methyl)pyridine (617 mg) was obtained. Yield: 55%.  $^1\text{H}$  NMR: (600 MHz,  $\text{CDCl}_3$ )  $\delta$ : 8.81 (d, 1H), 8.45 (d, 1H), 7.87 (d, 2H), 7.66 (t, 1H), 7.54 (m, 1H), 7.42 (d, 1H), 7.21 (m, 1H), 4.84 (s, 2H).

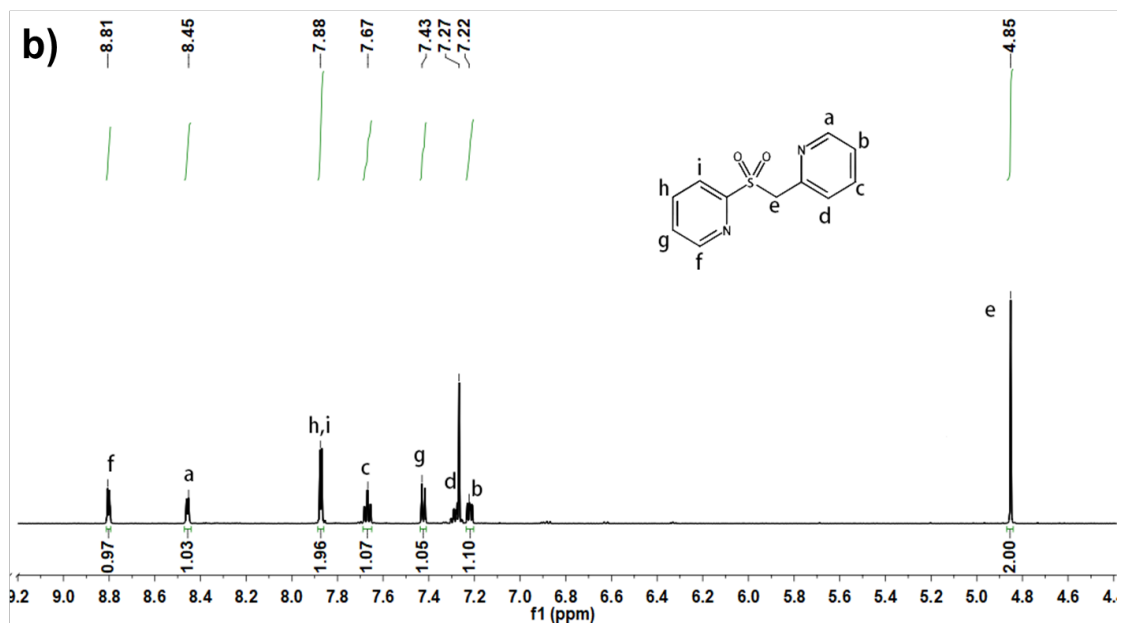

**Figure S2.** <sup>1</sup>H NMR (600 MHz, CDCl<sub>3</sub>) of L.

**Table S1.** Crystallographic data of the ligand L and complexes **1-5**.

| compound                           | L                                                               | 1                                                                   | 2                                                                                 | 3                                                                                | 4                                                                                 | 5                                                                                                |
|------------------------------------|-----------------------------------------------------------------|---------------------------------------------------------------------|-----------------------------------------------------------------------------------|----------------------------------------------------------------------------------|-----------------------------------------------------------------------------------|--------------------------------------------------------------------------------------------------|
| Chemical formula                   | C <sub>11</sub> H <sub>10</sub> N <sub>2</sub> O <sub>2</sub> S | C <sub>11</sub> H <sub>10</sub> AgClN <sub>2</sub> O <sub>6</sub> S | C <sub>13</sub> H <sub>10</sub> Ag F <sub>3</sub> N <sub>2</sub> O <sub>4</sub> S | C <sub>14</sub> H <sub>10</sub> AgF <sub>5</sub> N <sub>2</sub> O <sub>4</sub> S | C <sub>11</sub> H <sub>10</sub> Cl <sub>2</sub> CuN <sub>2</sub> O <sub>2</sub> S | C <sub>11</sub> H <sub>10</sub> C <sub>7</sub> Cu N <sub>2</sub> O <sub>3.5</sub> S <sub>1</sub> |
| Formula weight                     | 234.27                                                          | 441.59                                                              | 455.16                                                                            | 505.17                                                                           | 368.71                                                                            | 392.71                                                                                           |
| Crystal system                     | monoclinic                                                      | triclinic                                                           | monoclinic                                                                        | orthorhombic                                                                     | monoclinic                                                                        | triclinic                                                                                        |
| Space group                        | P 21/c                                                          | P -1                                                                | P 21/c                                                                            | P b c a                                                                          | P 21/n                                                                            | P -1                                                                                             |
| <i>a</i> (Å)                       | 6.1391(5)                                                       | 8.1846(4)                                                           | 9.2069(6)                                                                         | 13.5906(5)                                                                       | 7.7548(5)                                                                         | 7.6414(5)                                                                                        |
| <i>b</i> (Å)                       | 12.3196(9)                                                      | 9.1335(6)                                                           | 10.3554(6)                                                                        | 15.3623(6)                                                                       | 13.6358(10)                                                                       | 8.3115(6)                                                                                        |
| <i>c</i> (Å)                       | 14.8420(9)                                                      | 10.3479(6)                                                          | 16.4755(11)                                                                       | 16.9588(6)                                                                       | 12.7451(9)                                                                        | 12.1704(9)                                                                                       |
| $\alpha$ (°)                       | 90                                                              | 85.194(4)                                                           | 90                                                                                | 90                                                                               | 90                                                                                | 92.816(5)                                                                                        |
| $\beta$ (°)                        | 97.954(6)                                                       | 79.853(4)                                                           | 101.116(4)                                                                        | 90                                                                               | 100.228(4)                                                                        | 97.234(5)                                                                                        |
| $\gamma$ (°)                       | 90                                                              | 70.598(4)                                                           | 90                                                                                | 90                                                                               | 90                                                                                | 100.802(5)                                                                                       |
| Unit cell Volume (Å <sup>3</sup> ) | 1111.72(14)                                                     | 717.94(7)                                                           | 1541.32(17)                                                                       | 3540.7(2)                                                                        | 1326.29(16)                                                                       | 751.12(9)                                                                                        |

|                                                                                                       |            |            |             |             |             |             |
|-------------------------------------------------------------------------------------------------------|------------|------------|-------------|-------------|-------------|-------------|
| Temperature (K)                                                                                       | 296(2)     | 296(2)     | 296(2)      | 296(2)      | 296(2)      | 296(2)      |
| <i>Z</i>                                                                                              | 4          | 2          | 4           | 8           | 4           | 2           |
| Reflection collected/unique                                                                           | 13825/2267 | 9859/ 2938 | 22286/ 3155 | 54676/ 4307 | 10697/ 2705 | 10220/ 3593 |
| <i>R</i> <sub>int</sub>                                                                               | 0.0713     | 0.0325     | 0.0536      | 0.0340      | 0.0436      | 0.0449      |
| Final <i>R</i> <sub>1</sub> values <sup>a</sup> ( <i>I</i> > 2σ( <i>I</i> ))                          | 0.0385     | 0.0346     | 0.0423      | 0.0279      | 0.0369      | 0.0413      |
| Final <i>wR</i> ( <i>F</i> <sup>2</sup> ) values <sup>b</sup> (all data) ( <i>I</i> > 2σ( <i>I</i> )) | 0.0866     | 0.0691     | 0.0992      | 0.0678      | 0.0573      | 0.0898      |
| Final <i>R</i> <sub>1</sub> values (all data)                                                         | 0.0734     | 0.0534     | 0.0802      | 0.0347      | 0.0687      | 0.0687      |
| Final <i>wR</i> ( <i>F</i> <sup>2</sup> ) values (all data)                                           | 0.0974     | 0.0780     | 0.1187      | 0.0721      | 0.0661      | 0.1019      |
| Goodness-of-fit (GOD) on <i>F</i> <sup>2</sup>                                                        | 1.076      | 1.059      | 1.048       | 1.036       | 1.047       | 1.051       |

<sup>a</sup>  $R_1 = \Sigma||F_o| - |F_c||/\Sigma|F_o|$ .

<sup>b</sup>  $wR_2 = \{\Sigma[w(F_o^2 - F_c^2)^2]/\{\Sigma[w(F_o^2)^2]\}^{1/2}$ .

**Table S2.** Hydrogen-bonding geometry (Å, °).

| Complexes | D-H...A       | D-H (Å) | H...A (Å) | D...A (Å) | ∠D-H...A (°) | Symmetry code of A            |
|-----------|---------------|---------|-----------|-----------|--------------|-------------------------------|
| <b>L</b>  | C6-H6B...N2   | 0.970   | 2.683     | 3.640(3)  | 169.43       | $-x + 1, -y, -z + 1$          |
|           | C8-H8...O2    | 0.930   | 2.522     | 3.374(3)  | 152.48       | $x + 1, y, z$                 |
|           | C2-H2...O6    | 0.930   | 2.612     | 3.228(2)  | 124.16       | $x + 1, y, z$                 |
| <b>1</b>  | C4-H4...O3    | 0.930   | 2.648     | 3.509(3)  | 154.23       | $x, y, z$                     |
|           | C6-H6A...O5   | 0.970   | 2.611     | 3.578(3)  | 174.43       | $-x + 1, -y + 1, -z$          |
|           | C6-H6A...O5   | 0.970   | 2.597     | 3.217(4)  | 122.00       | $-x + 1, -y + 1, -z$          |
|           | C6-H6B...O6   | 0.970   | 2.337     | 3.243(3)  | 155.14       | $x, y, z$                     |
|           | C8-H8...O3    | 0.930   | 2.656     | 3.407(3)  | 138.35       | $x, y - 1, z$                 |
|           | C10-H10...O1  | 0.930   | 2.550     | 3.240(3)  | 131.26       | $x - 1, y, z$                 |
|           | C6-H6A...O3   | 0.970   | 2.576     | 3.462(2)  | 151.94       | $x, y, z$                     |
| <b>2</b>  | C6-H6B...O4   | 0.970   | 2.304     | 3.257(2)  | 167.01       | $x - 1/2, y, -z + 1/2$        |
|           | C11-H11...O2  | 0.930   | 2.577     | 3.318(3)  | 136.94       | $x - 1/2, y, -z + 1/2$        |
| <b>3</b>  | C4-H4...O4    | 0.930   | 2.626     | 3.542(3)  | 168.65       | $-x + 1, y - 1/2, -z + 1/2$   |
|           | C6-H6A...O2   | 0.970   | 2.224     | 3.094(3)  | 148.70       | $-x + 1, y - 1/2, -z + 1/2$   |
|           | C1-H1...O1    | 0.930   | 2.505     | 3.259(3)  | 138.28       | $x + 1/2, -y + 1/2, z + 1/2$  |
|           | C4-H4...Cl2   | 0.930   | 2.553     | 3.472(4)  | 169.35       | $x - 1/2, -y + 1/2, z - 1/2$  |
| <b>4</b>  | C6-H6A...Cl1  | 0.970   | 2.864     | 3.664(4)  | 140.31       | $x, y, z$                     |
|           | C6-H6B...Cl1  | 0.970   | 2.640     | 3.414(3)  | 136.99       | $x - 1/2, -y + 1/2, z - 1/2$  |
|           | C10-H10...Cl2 | 0.930   | 2.978     | 3.554(2)  | 121.50       | $-x + 1/2, y + 1/2, -z + 1/2$ |
|           | C11-H11...Cl2 | 0.930   | 2.798     | 3.482(3)  | 131.17       | $-x + 1/2, y + 1/2, -z + 1/2$ |
|           | C2-H2...Cl1   | 0.930   | 2.909     | 3.679(3)  | 141.02       | $x, y + 1, z$                 |
| <b>5</b>  | C2-H2...O2    | 0.930   | 2.502     | 3.284(3)  | 141.88       | $x, y + 1, z$                 |
|           | C4-H4...Cl2   | 0.930   | 2.982     | 3.552(4)  | 121.02       | $-x + 1, -y + 1, -z + 1$      |
|           | C6-H6A...O1   | 0.970   | 2.416     | 3.330(2)  | 156.97       | $-x, -y, -z + 1$              |
|           | C6-H6B...Cl2  | 0.970   | 2.607     | 3.515(3)  | 156.00       | $x - 1, y, z$                 |
|           | C11-H11...Cl1 | 0.930   | 2.641     | 3.466(3)  | 148.24       | $-x + 1, -y, -z$              |
